# Supplementary material for: ACSS2-mediated NF-κB activation promotes alkaliptosis in human pancreatic cancer cells
Source: PubMed Central journal article supplement (PMC9883393; doi:10.1038/s41598-023-28261-4), 2023-01-27

Fig 1. Western blot raw data

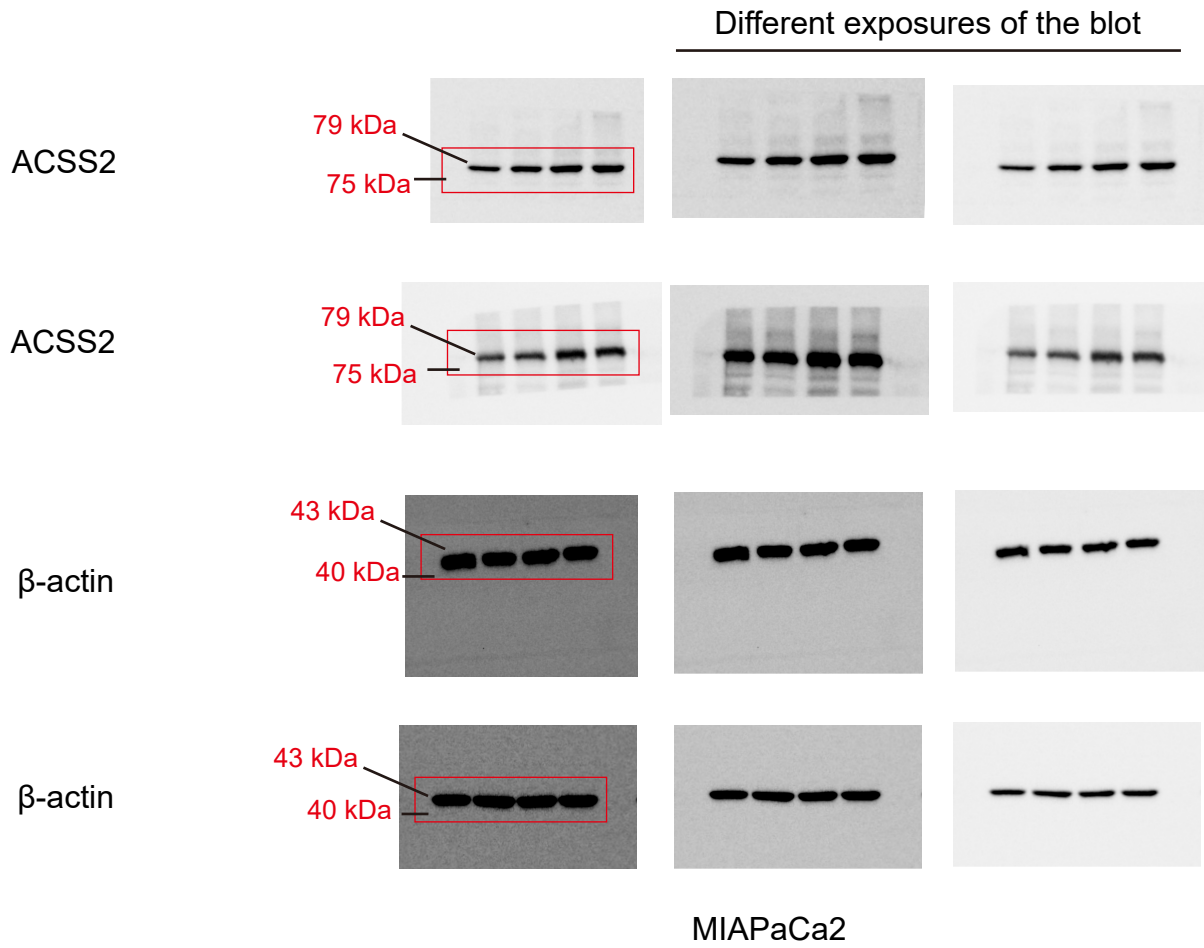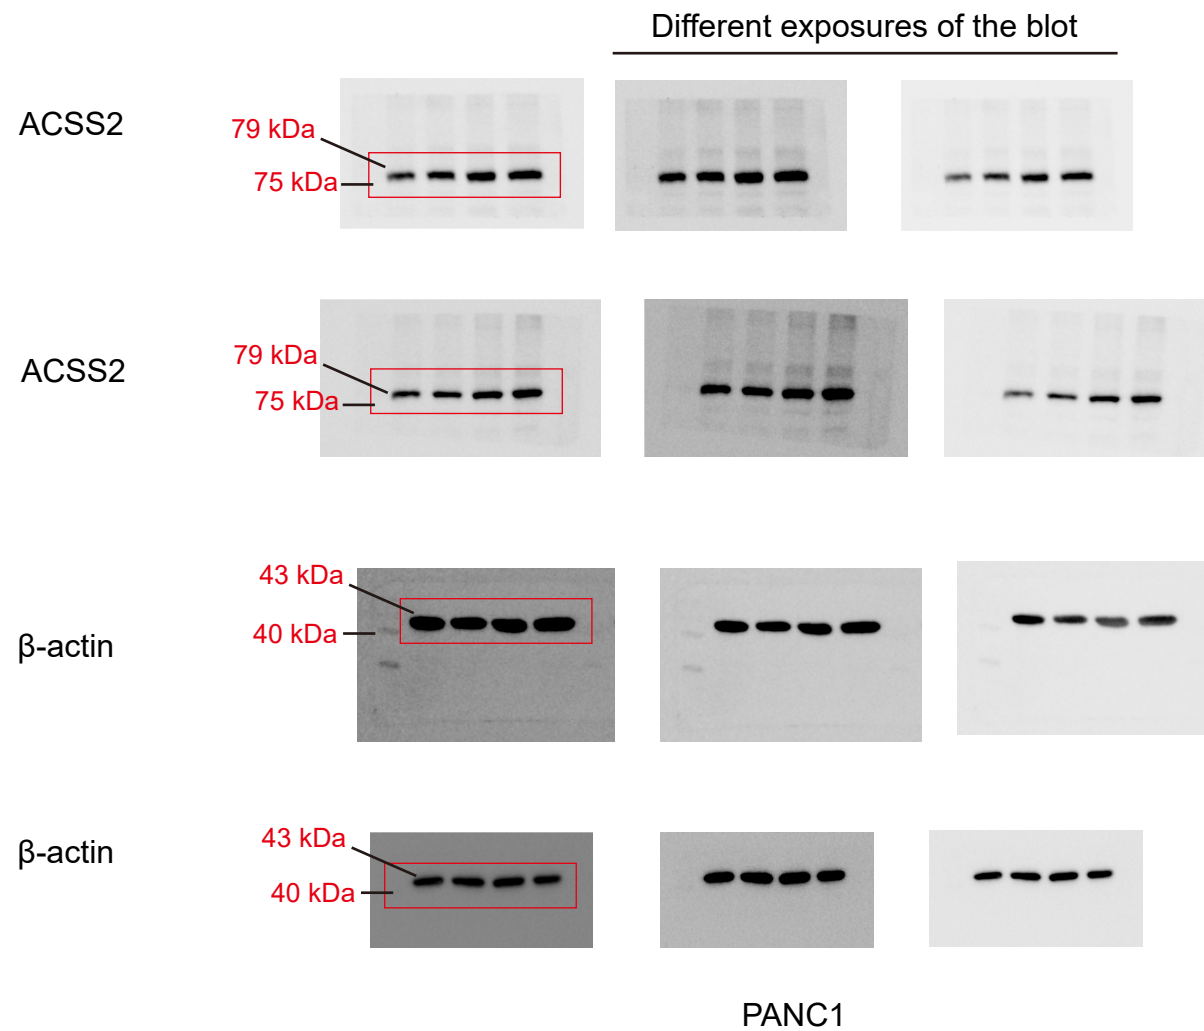

Fig 1. Western blot raw data

Different exposures of the blot

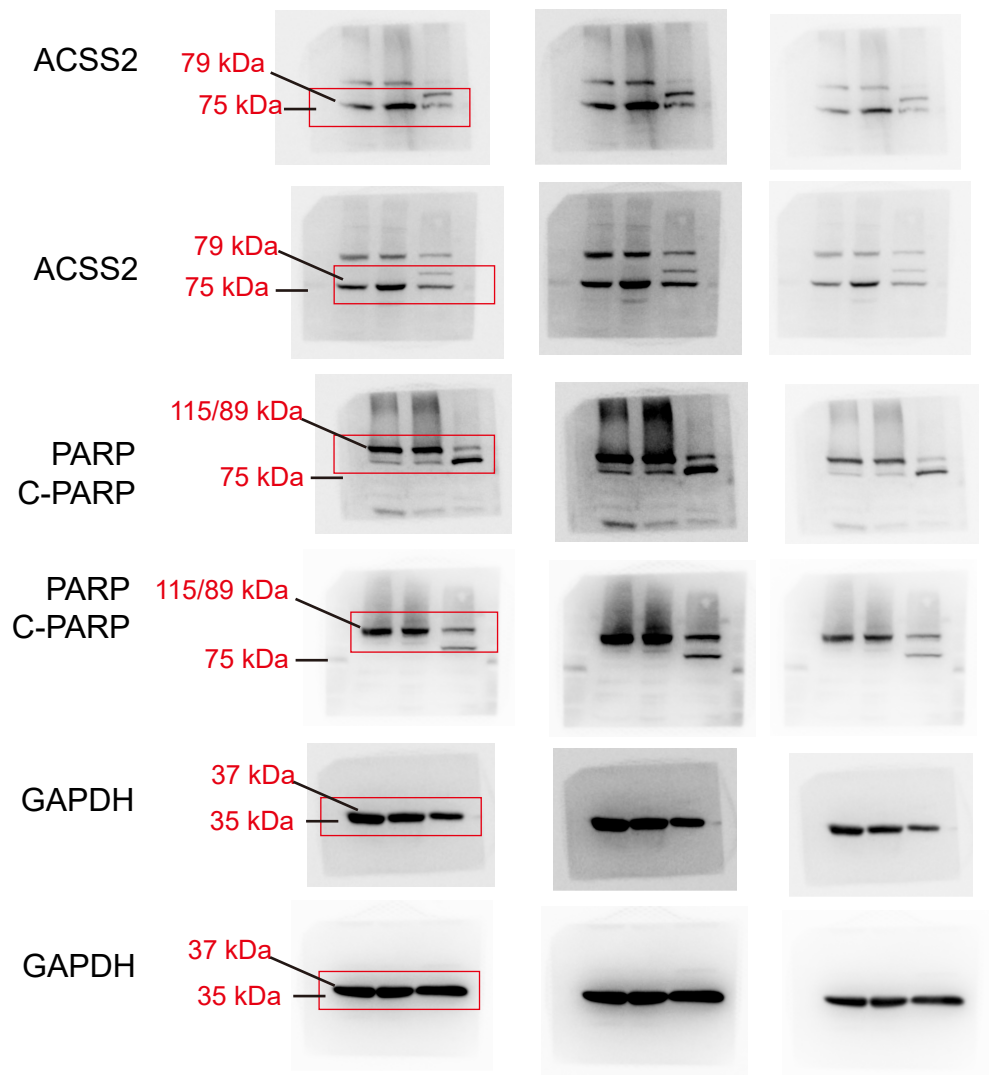

Fig 2. Western blot raw data

Different exposures of the blot

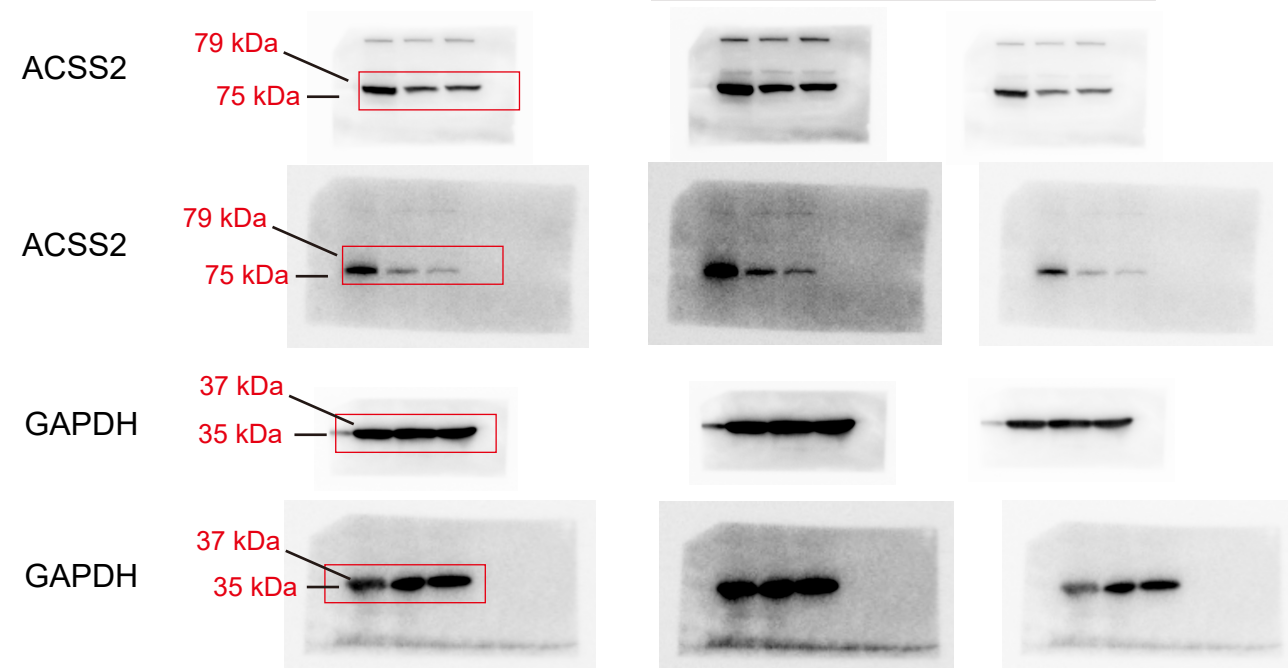



Fig 2. Western blot raw data

Different exposures of the blot

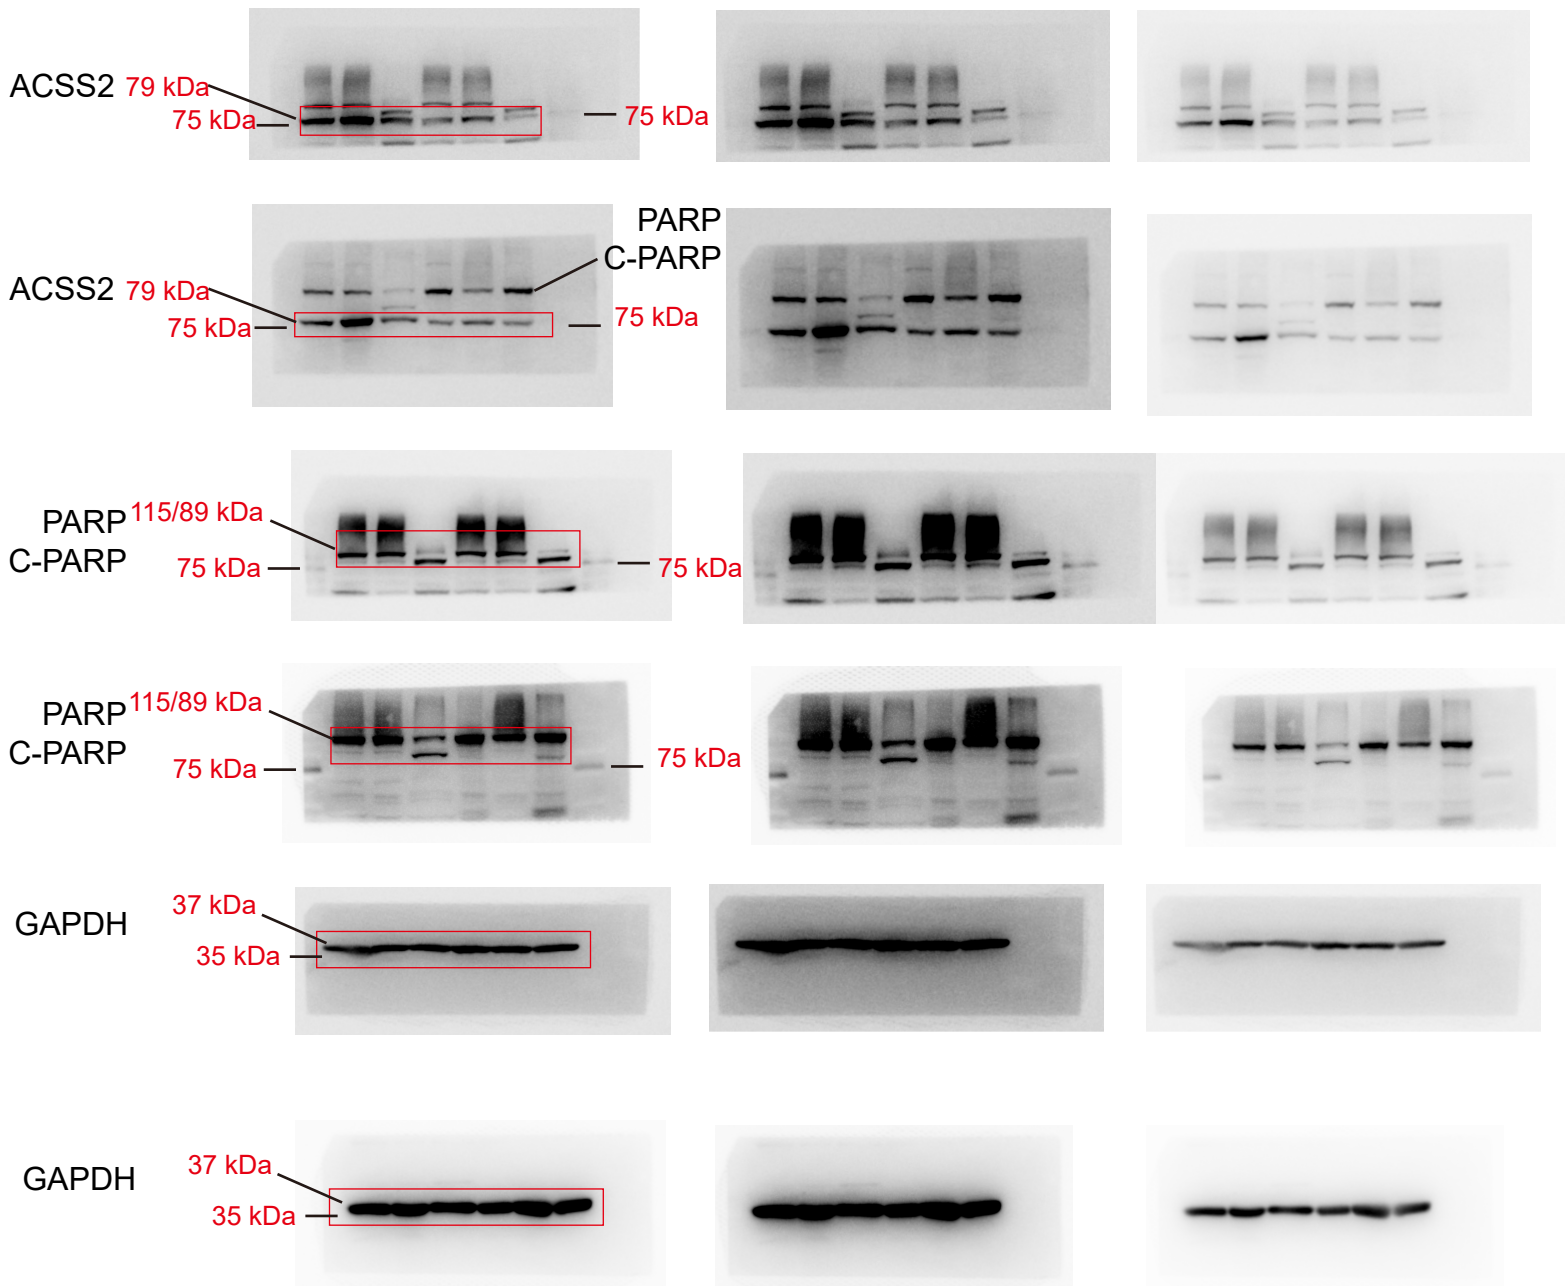

Fig 4. CoIP raw data

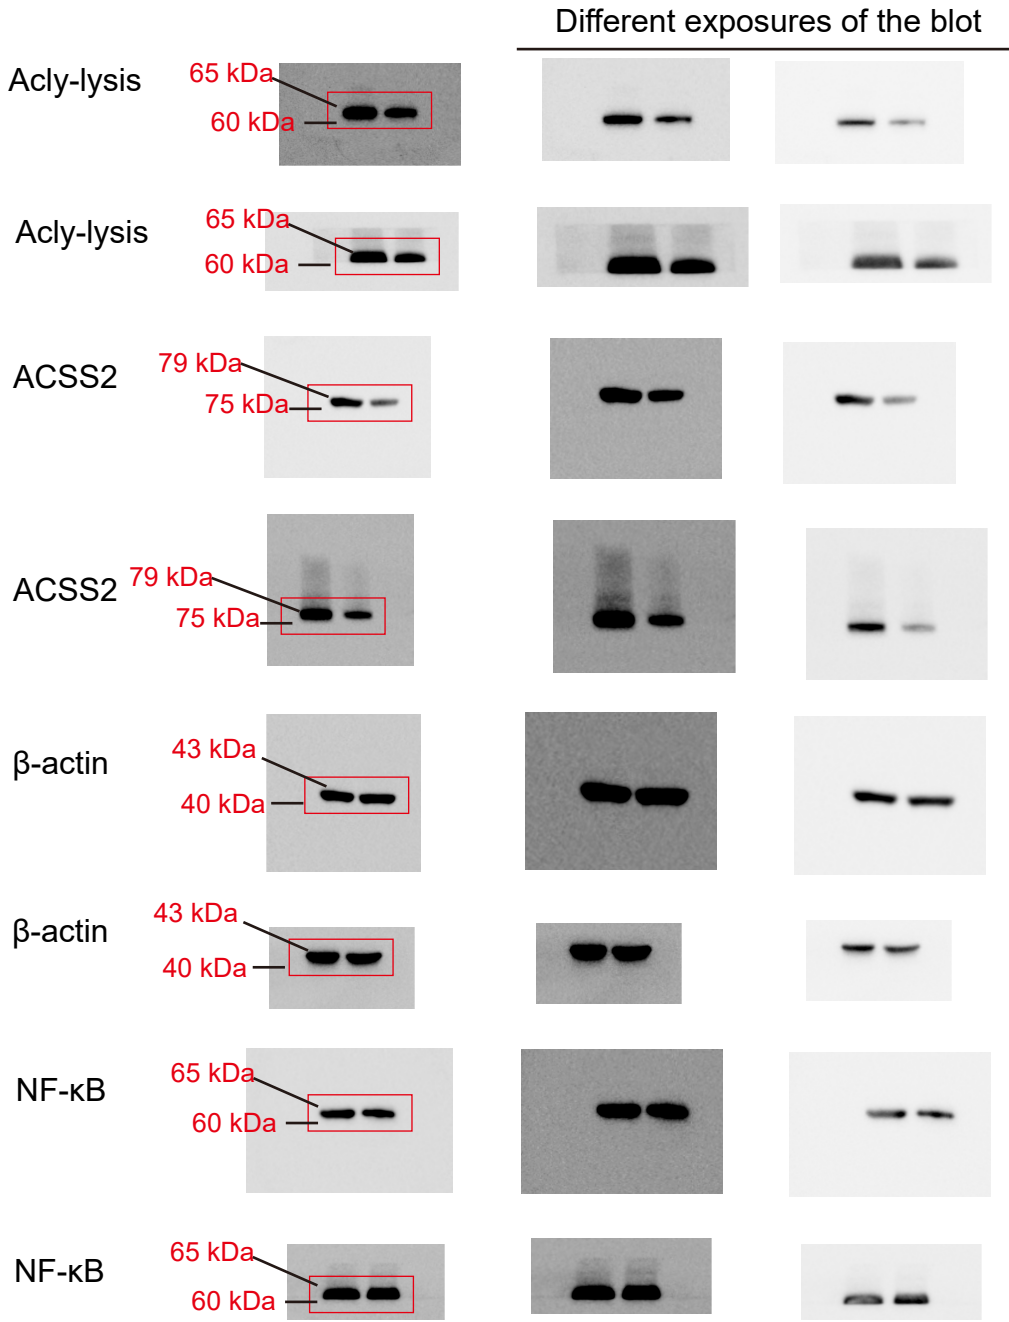

Fig 4. Western blot raw data

Different exposures of the blot

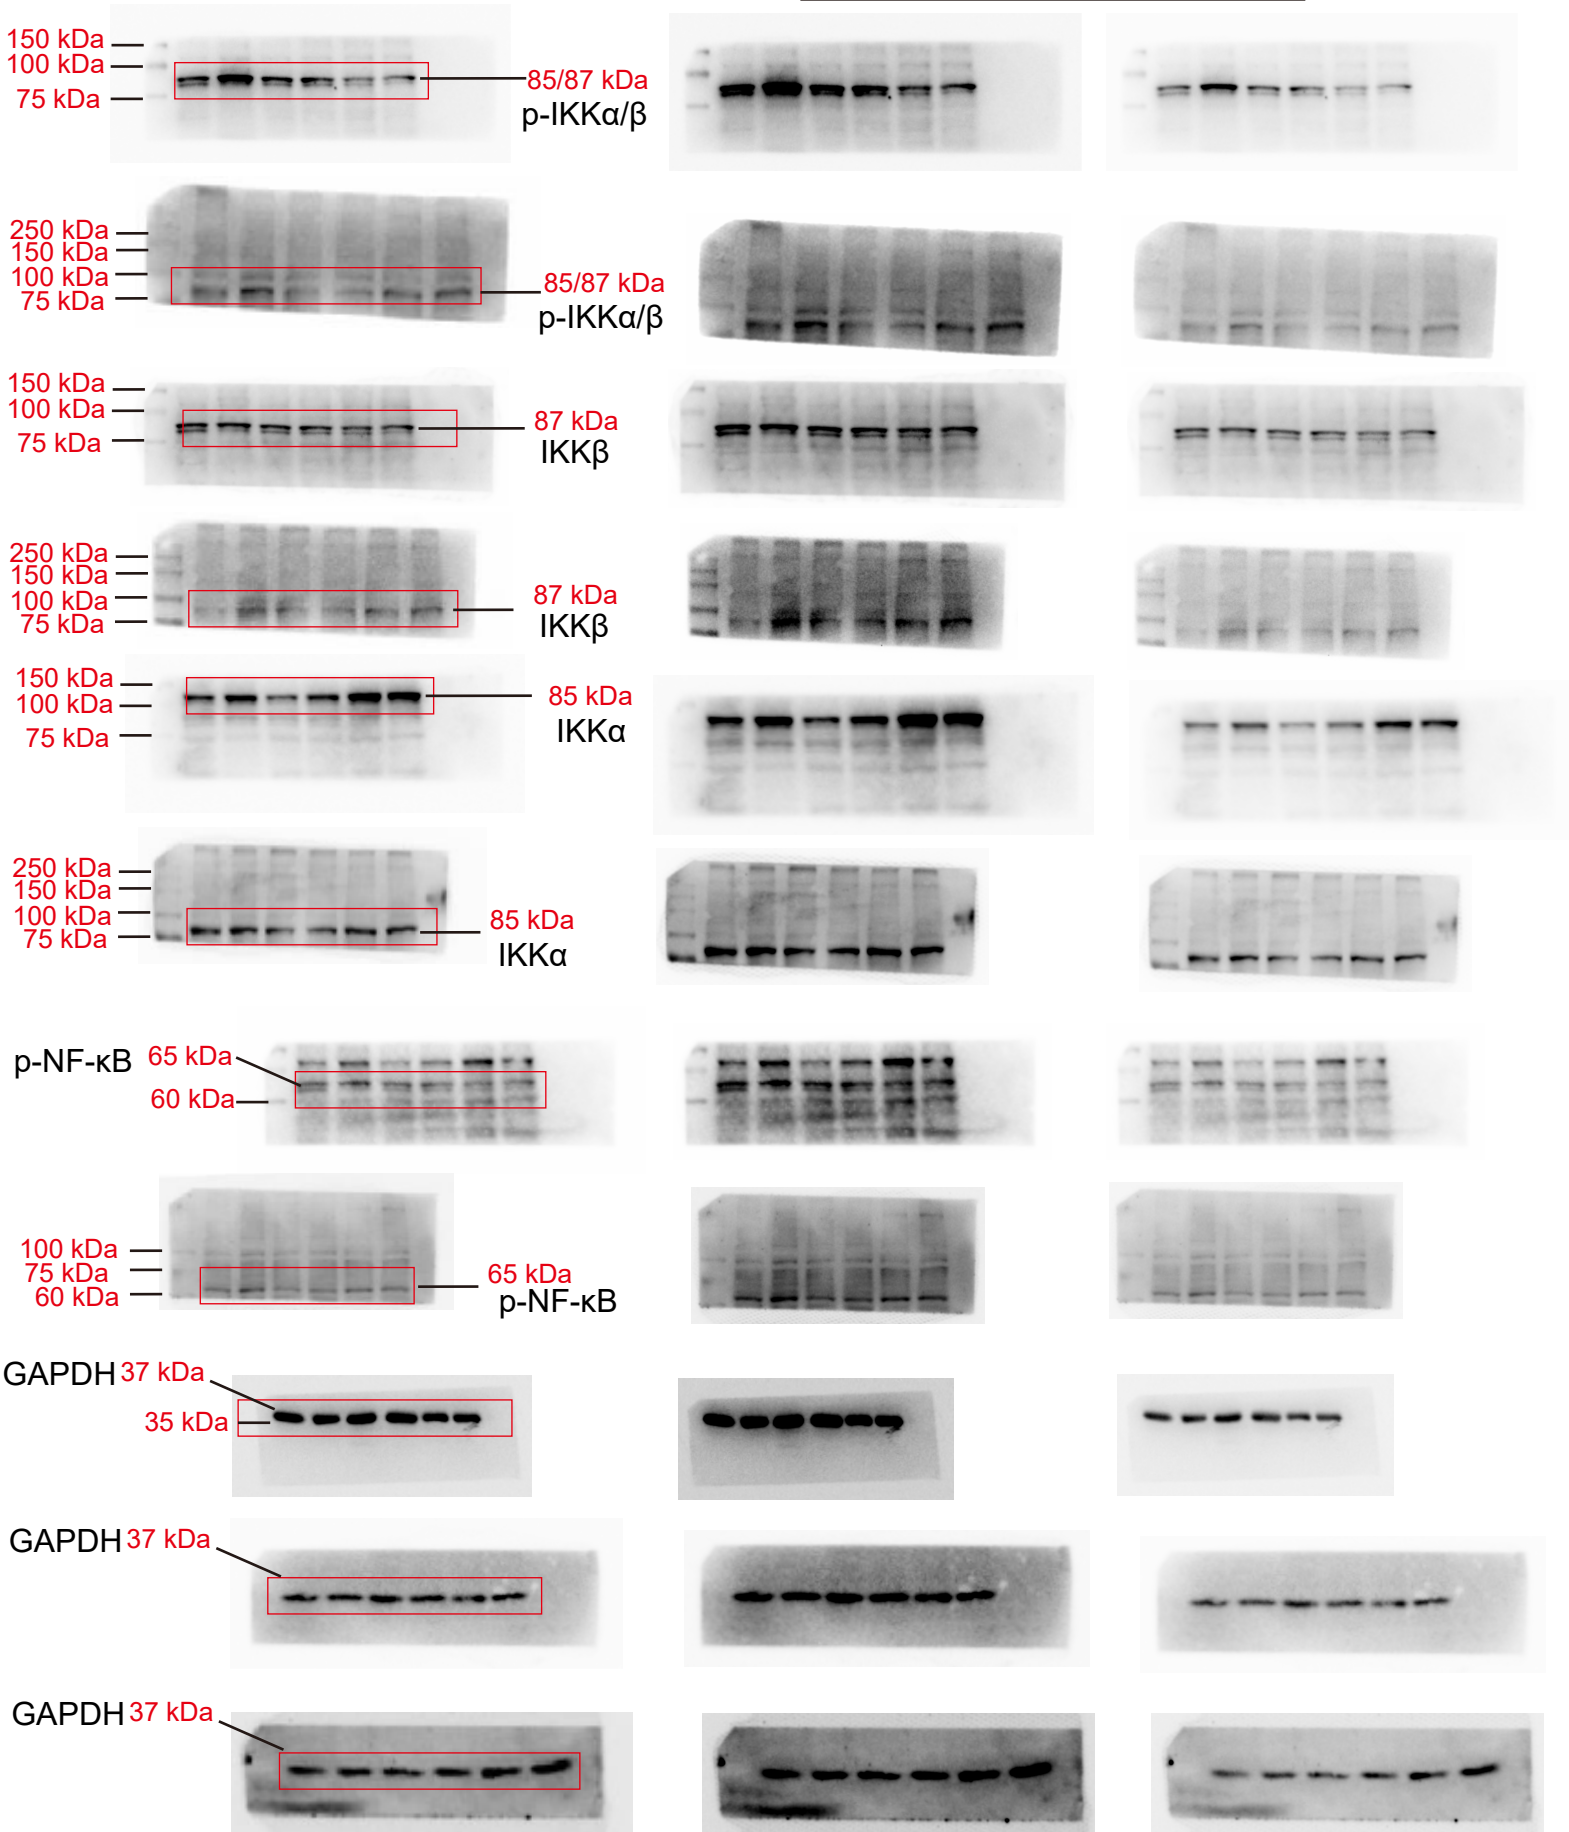

Fig 4. Western blot raw data

Different exposures of the blot

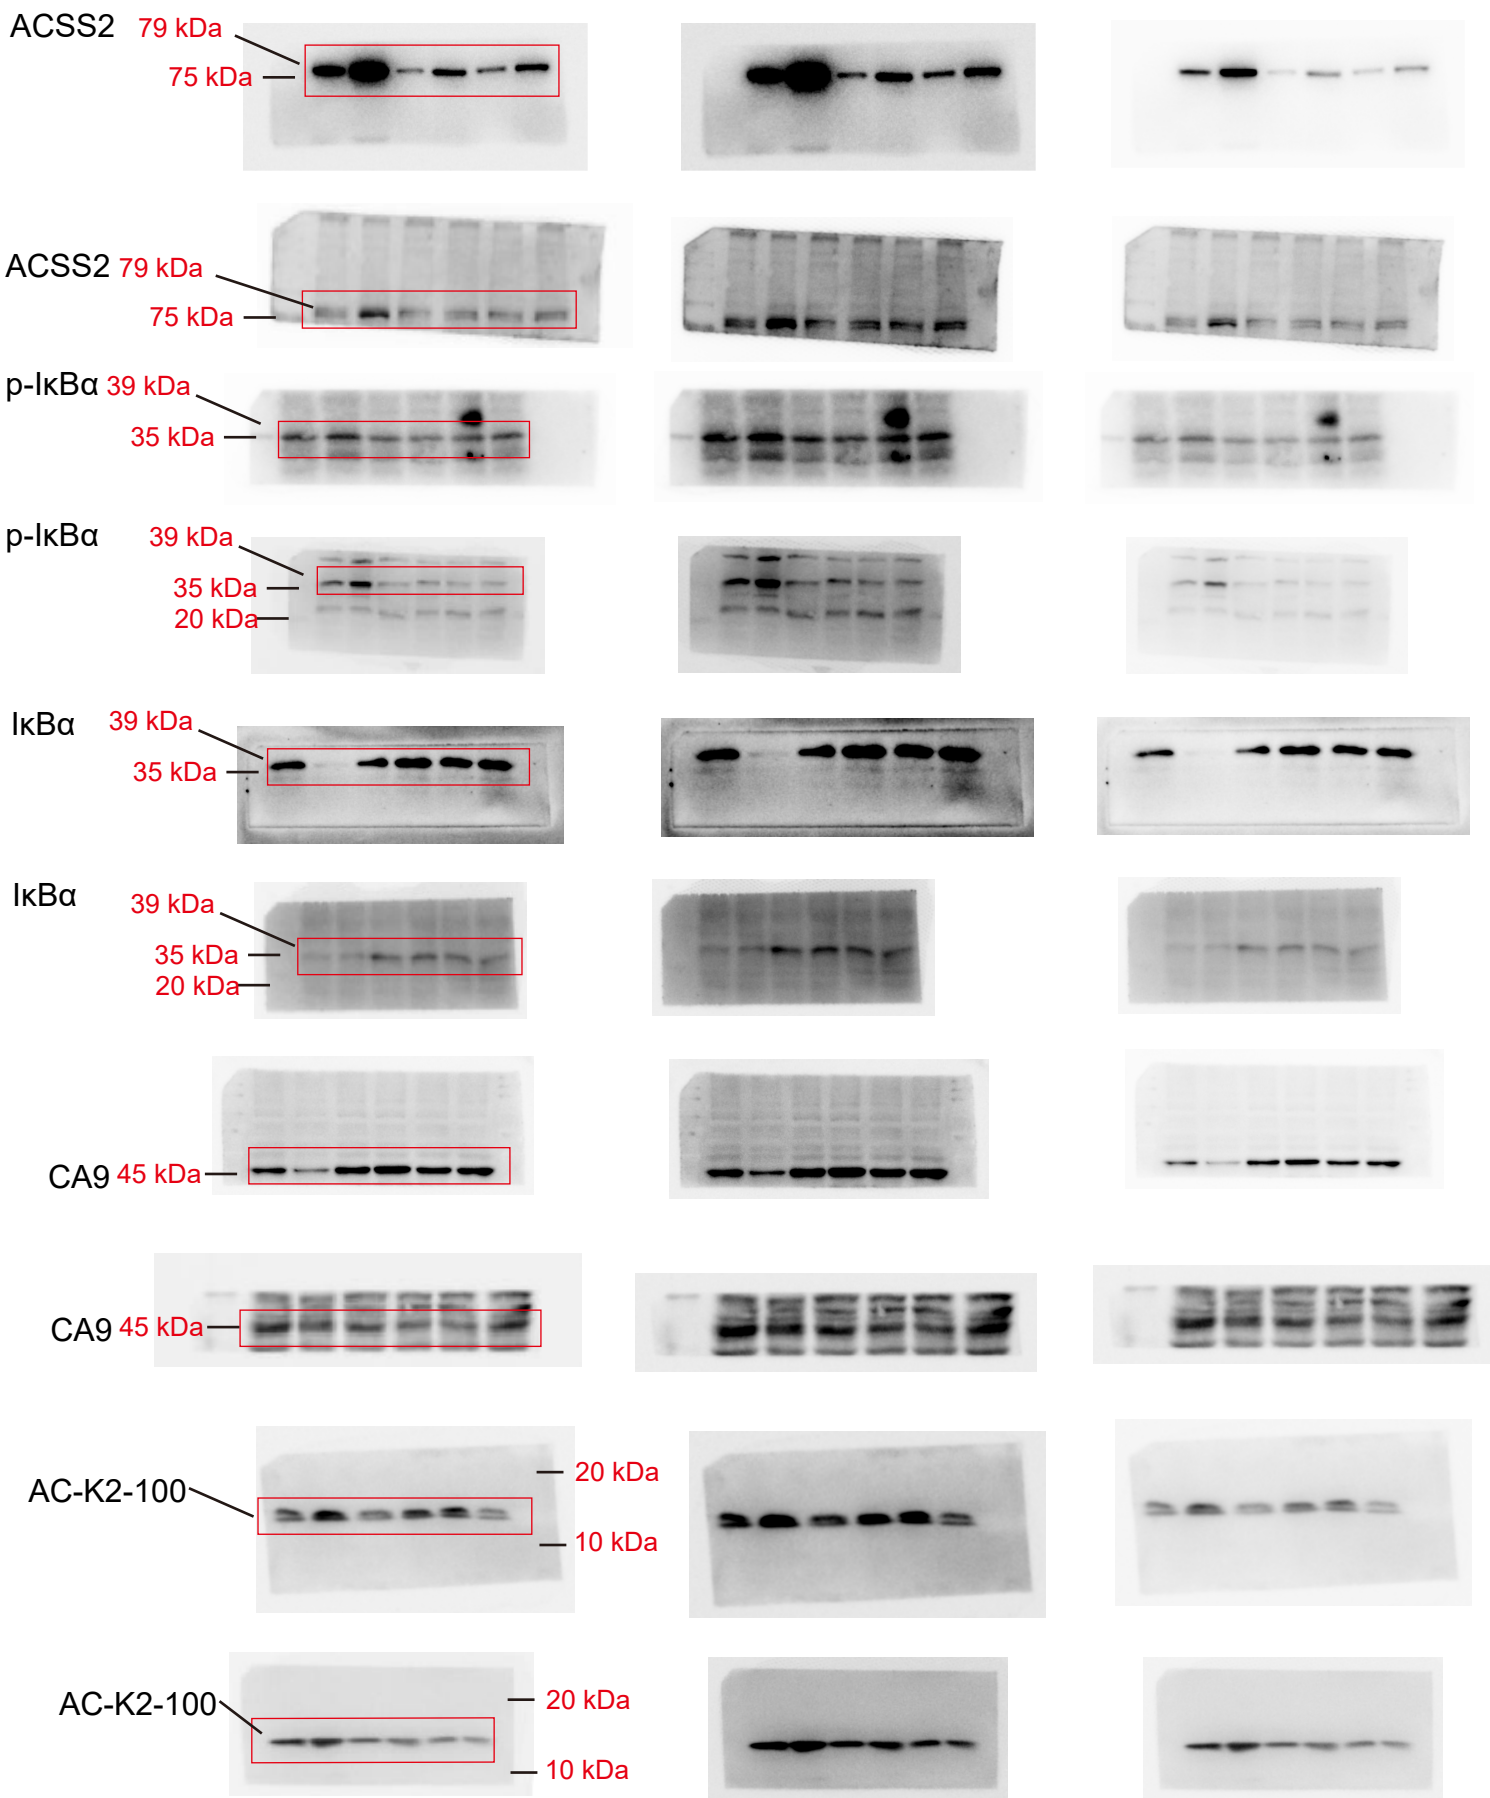

Supplement Fig 3.raw data

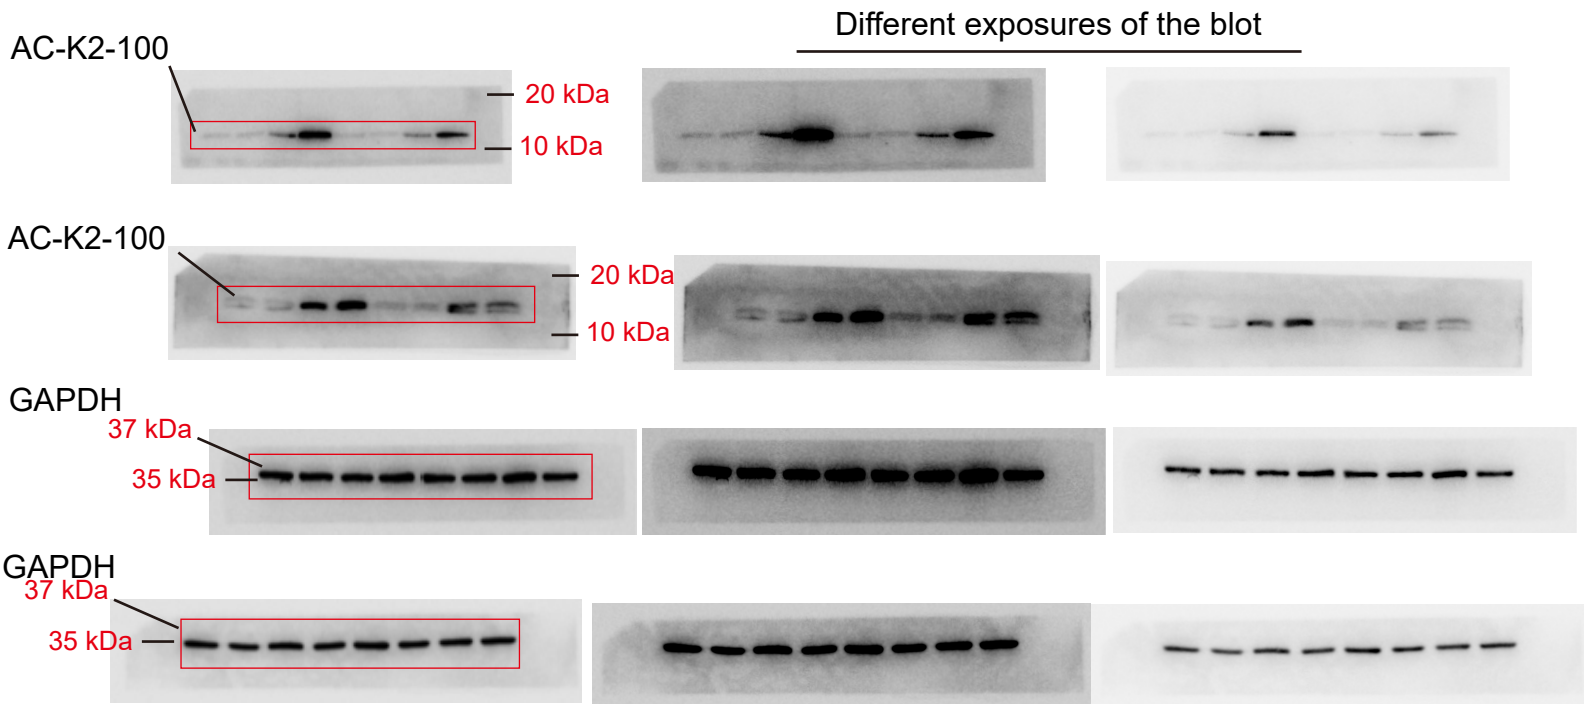

Supplement Fig 4.raw data

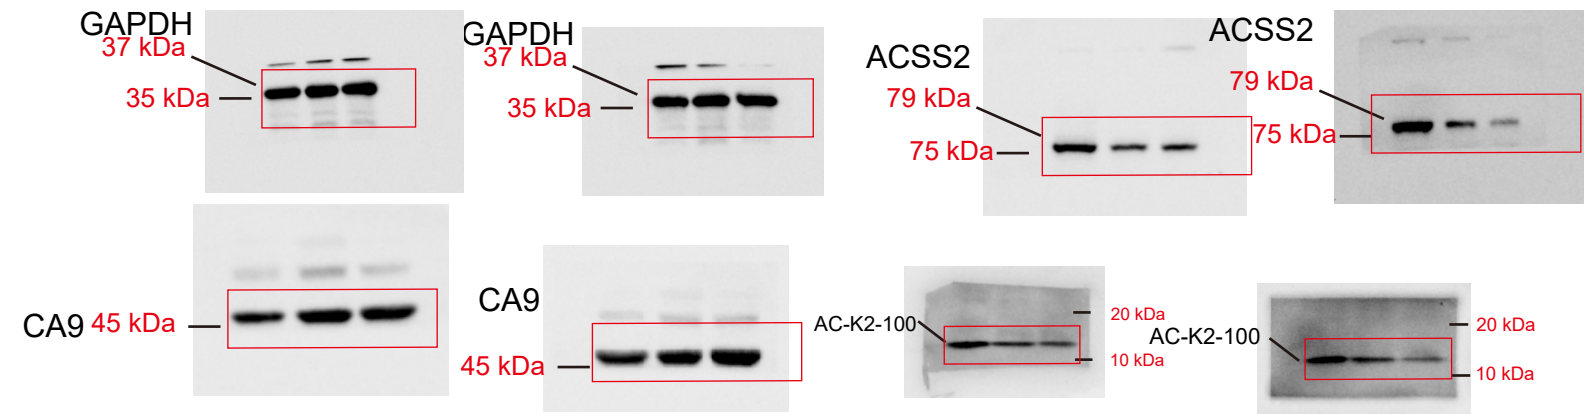

Supplement Fig 5.raw data

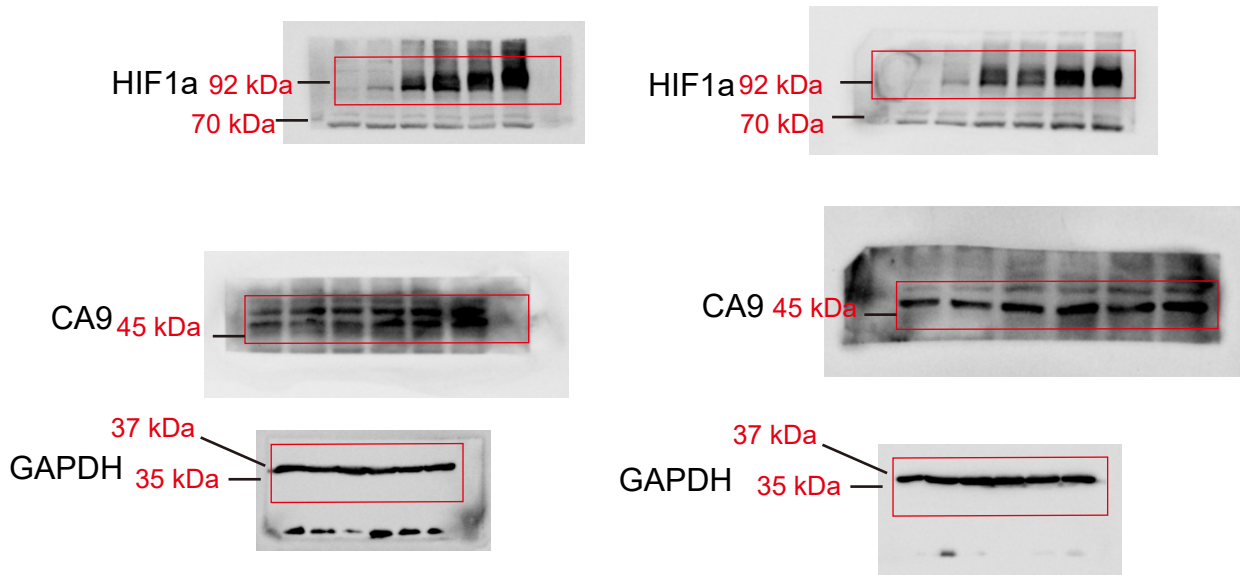

Supplement: 41598_2023_28261_MOESM1_ESM.pdf [file 41598_2023_28261_MOESM1_ESM.pdf]
