# Supplementary material for: ACSS2-mediated NF-κB activation promotes alkaliptosis in human pancreatic cancer cells
Source: PubMed Central journal article supplement (PMC9883393; doi:10.1038/s41598-023-28261-4), 2023-01-27
Supplement: 41598_2023_28261_MOESM2_ESM.pdf [file 41598_2023_28261_MOESM2_ESM.pdf]

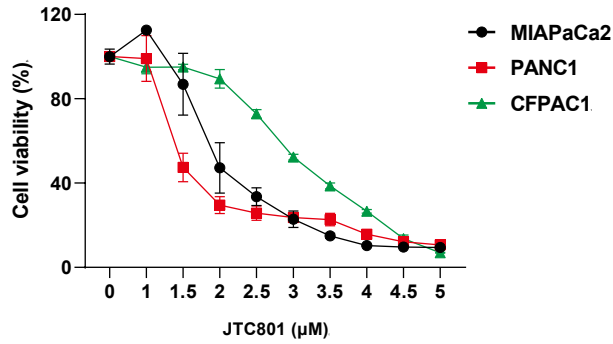

Supplementary Figure 1. Anticancer activity of JTC801 in vitro

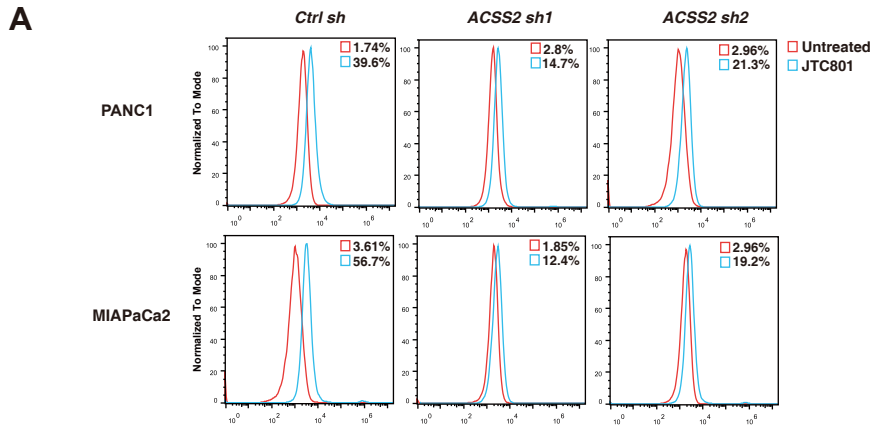

Supplementary Figure 2. ACSS2 is a positive regulator of alkaliptosis.

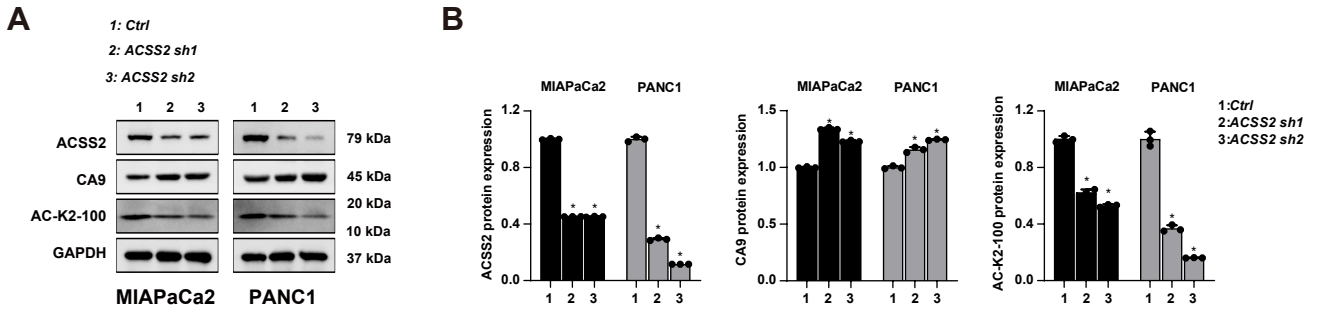

**C**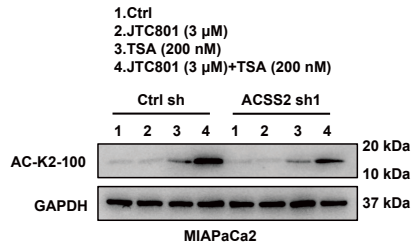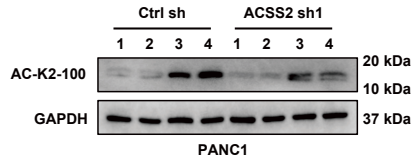**D**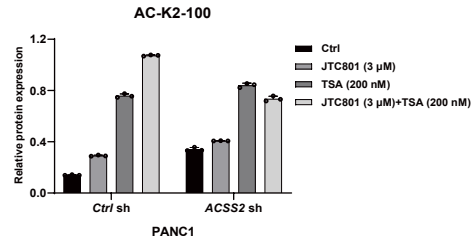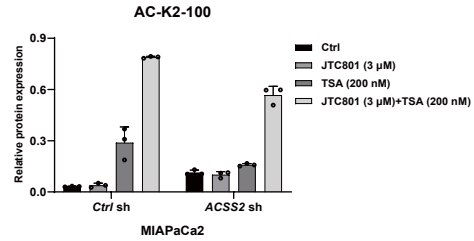

**Supplementary Figure 3. Acetylation inhibits CA9 expression and TSA enhances acetylation.**

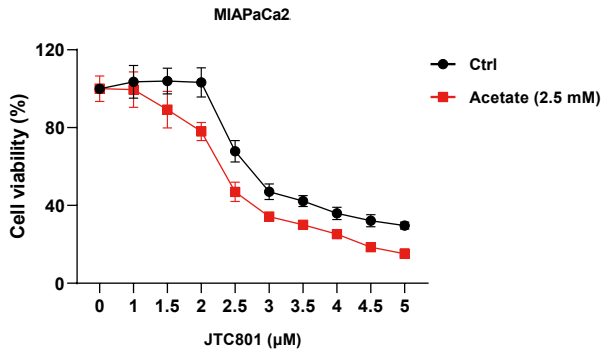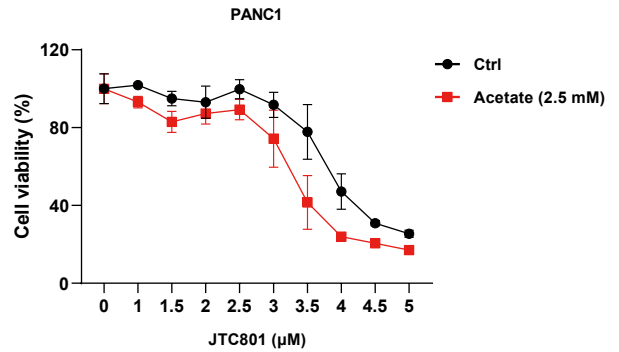

**Supplementary Figure 4. Acetate enhances JTC801-induced cell death.**

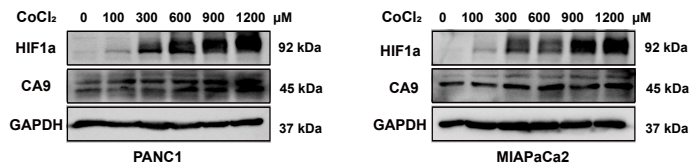

**Supplementary Figure 5. CA9 is upregulated during hypoxia**
